# Supplementary material for: MICRA: Microstructural image compilation with repeated acquisitions
Source: PubMed Central journal article supplement (PMC7779421; doi:10.1016/j.neuroimage.2020.117406), 2021-01-15
Supplement: mmc1.pdf [file mmc1.pdf]

Supplementary Table 1. Data shared as part of MICRA

| Data Type                       | Raw (brain extracted nifti)                                              | Processed Maps (in native, diffusion and MNI space) |
|---------------------------------|--------------------------------------------------------------------------|-----------------------------------------------------|
| Multi-Shell Diffusion + CHARMED | nifti, bvals, bvecs<br>nifti, bvals and bvecs in opposite phase encoding | FA<br>MD<br>RD<br>RSF                               |
| QMT                             | 11 MT weightings + 0 MT weighting                                        | MMPF<br>MTR                                         |
| McDespot                        | ssfp_180<br>ssfp_0<br>spgr<br>spgr_IR                                    | MWF<br>R1                                           |

*\*MMMP and MWF not available in one session*
